# Supplementary material for: Profiling of Volatile Organic Compounds from Four Plant Growth-Promoting Rhizobacteria by SPME–GC–MS: A Metabolomics Study
Source: MDPI journal article supplement (doi:10.3390/metabo12080763), 2022-08-19
Supplement: s1 [file s1]

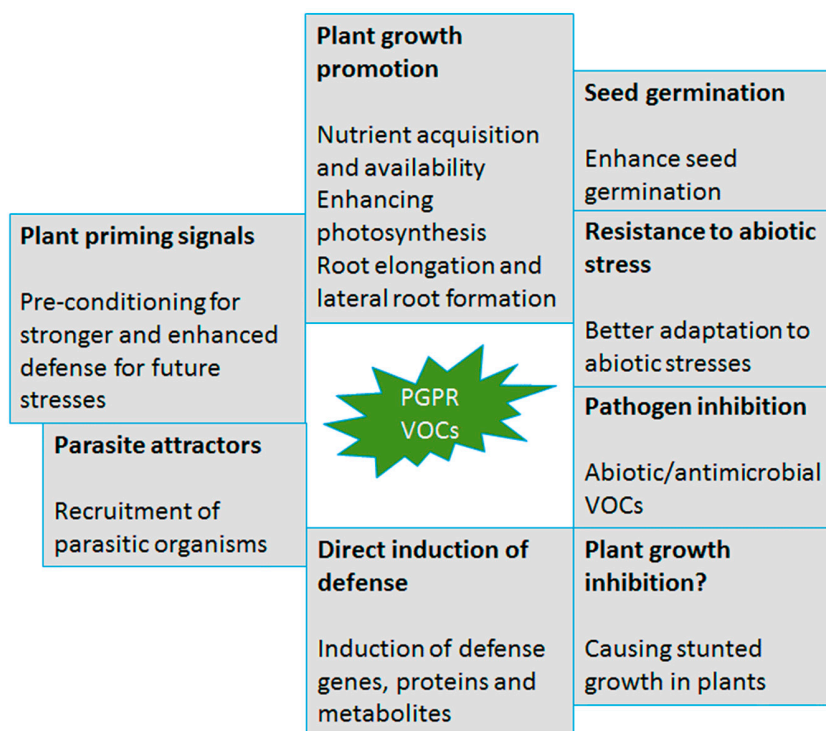

**Figure S1. Action mechanisms of PGPR-derived VOCs.** PGPR-emitted VOCs can influence different plant physiological processes in various ways. Some VOCs are able to inhibit germination and growth of plant pathogens in vitro or repel herbivores and attract herbivore parasitoids on infested plants. VOCs can impact on plant defensive systems by inducing the synthesis of defense genes, proteins and metabolites (e.g., phytoalexins) that impair microbial colonization. VOCs can also act as priming stimuli by inducing systemic changes and accumulation of transcription factors that may facilitate faster expression of plant defenses, thereby enhancing tolerance or resistance to a future stress.

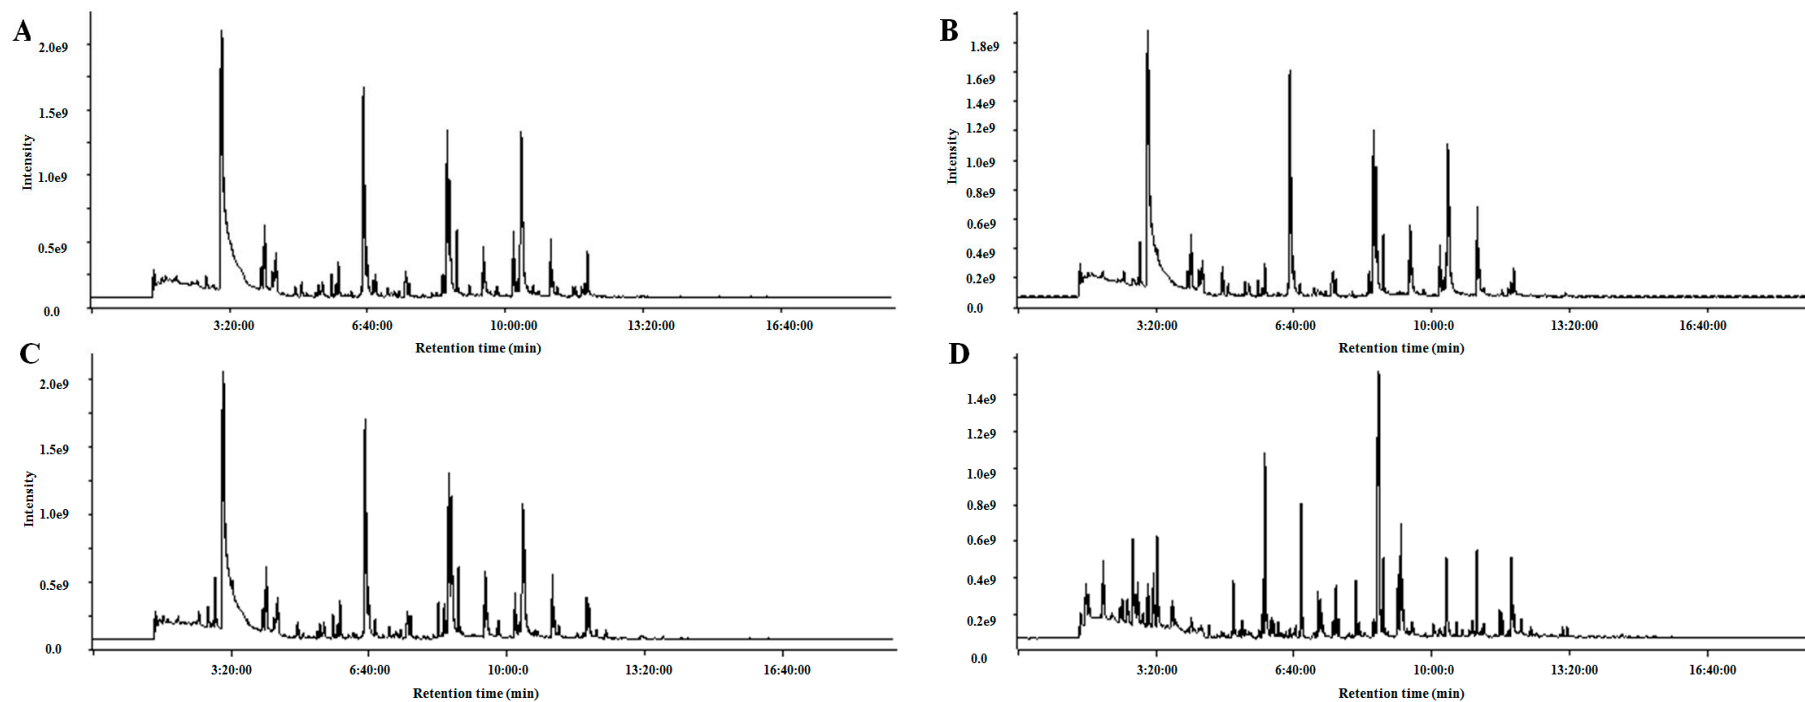

**Figure S2. Representative GC-TOF-MS chromatograms of PGPR volatiles sampled by head-space SPME.** GC-TOF-MS chromatograms displaying comparative chromatographic differences, and visual inspection thereof evidently shows differential peak populations. (A): *Pseudomonas fluorescens* N04, (B): *Pseudomonas koreensis* N19, (C): *Lysinibacillus sphaericus* T19 and (D): *Paenibacillus alvei* T22.

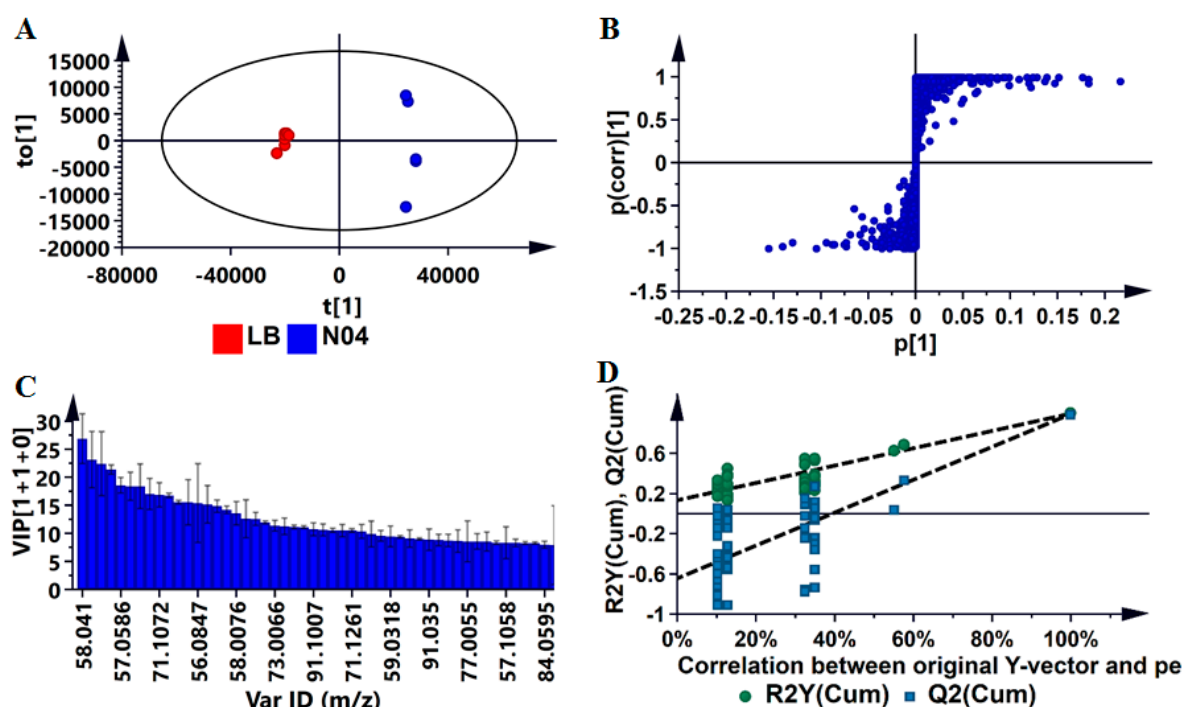

**Figure S3.** OPLS-DA modeling and variable/feature selection of *Pseudomonas fluorescens* N04 data acquired on GC-TOF-MS. **(A):** A typical OPLS-DA score separating un-inoculated media (LB) *vs.* inoculated media (N04) (1 + 1 + 0 components,  $R^2X = 0.895$ ,  $Q^2 = 0.999$ , CV-ANOVA  $p$ -value =  $1.3 \times 10^{-19}$ ). **(B):** An OPLS-DA loadings S-plot for the same model in **(A)**; only variables with the correlation [ $p(corr)$ ] of  $\geq |0.5|$  and covariance of ( $p1$ )  $\geq |0.5|$  were chosen as discriminating variables and identified using the  $m/z$  to generate elemental composition. **(C):** A **variable importance for the projection (VIP)** plot for the same model, pointing mathematically to the importance of each variable in contributing to group separation in the OPLS-DA model. **(D):** **The response permutation test plot** ( $n = 50$ ) for the same OPLS-DA model:  $R^2$  (0.0, 0.145) and  $Q^2$  (0.0 – 0.672) values of the permuted models are represented on the left-hand side of the plot, corresponding to y-axis intercepts.

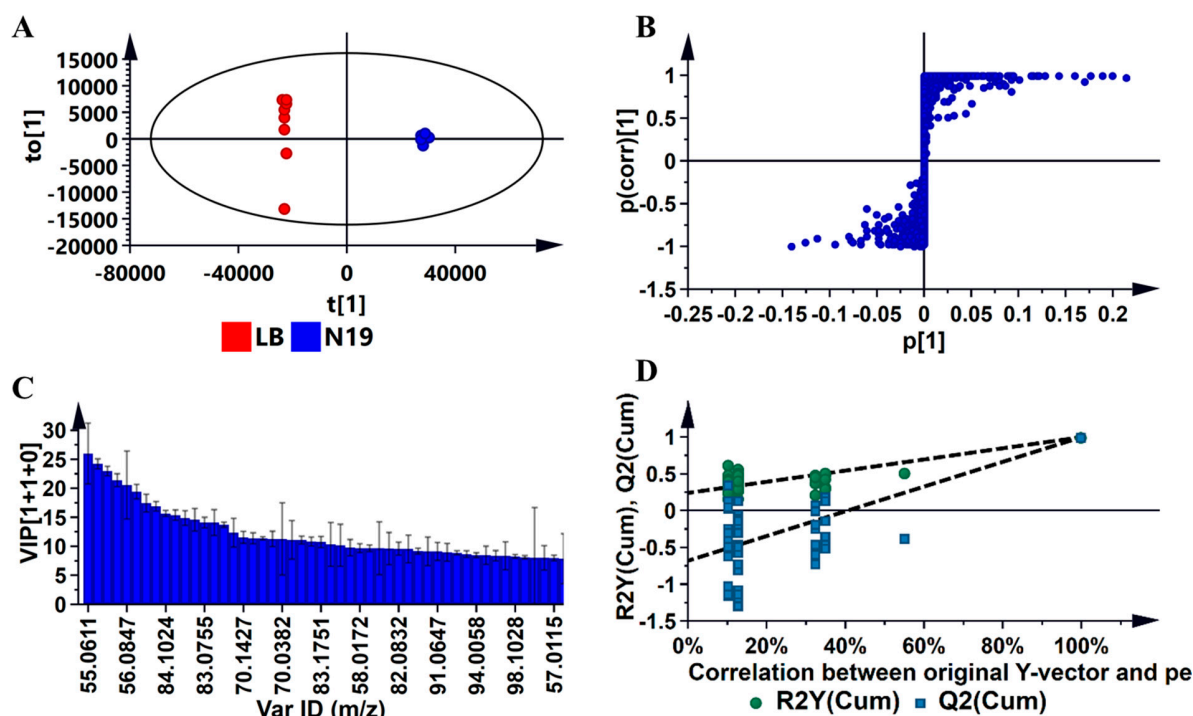

**Figure S4.** OPLS-DA modeling and variable/feature selection of *Pseudomonas koreensis* N19 data acquired on GC-TOF-MS. **(A):** A typical OPLS-DA score separating un-inoculated media (LB) *vs.* inoculated media (N19) (1 + 2 + 0 components,  $R^2X = 0.920$ ,  $Q^2 = 0.998$ , CV-ANOVA p-value =  $1.1 \times 10^{-12}$ ). **(B):** An OPLS-DA loadings S-plot for the same model in **(A)**; only variables with the correlation [ $p(corr)$ ] of  $\geq |0.5|$  and covariance of ( $p1$ )  $\geq |0.5|$  were chosen as discriminating variables and identified using the  $m/z$  to generate elemental composition. **(C):** A **variable importance for the projection (VIP)** plot for the same model, pointing mathematically to the importance of each variable in contributing to group separation in the OPLS-DA model. **(D):** The **response permutation test plot** ( $n = 50$ ) for the same OPLS-DA model:  $R^2$  (0.0, 0.273) and  $Q^2$  (0.0 – 0.606) values of the permuted models are represented on the left-hand side of the plot, corresponding to y-axis intercepts.

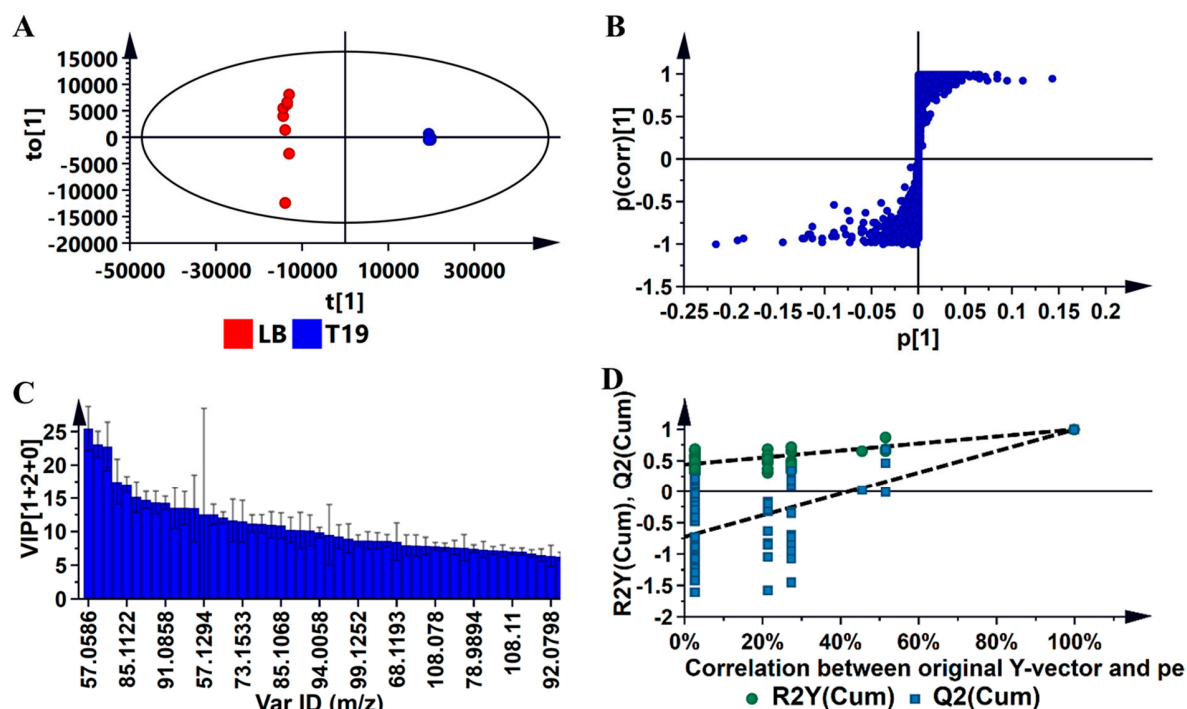

**Figure S5.** OPLS-DA modeling and variable/feature selection of *Paenibacillus alvei* T19 data acquired on GC-TOF-MS. **(A):** A typical OPLS-DA score separating un-inoculated media (LB) *vs.* inoculated media (T19) (1 + 1 + 0 components,  $R^2X = 0.885$ ,  $Q^2 = 0.999$ , CV-ANOVA p-value =  $1.6 \times 10^{-19}$ ). **(B):** An OPLS-DA loadings S-plot for the same model in **(A)**; only variables with the correlation [ $p(corr)$ ] of  $\geq |0.5|$  and covariance of ( $p1$ )  $\geq |0.5|$  were chosen as discriminating variables and identified using the  $m/z$  to generate elemental composition. **(C):** A variable importance for the projection (VIP) plot for the same model, pointing mathematically to the importance of each variable in contributing to group separation in the OPLS-DA model. **(D):** The response permutation test plot ( $n = 50$ ) for the same OPLS-DA model:  $R^2$  (0.0, 0.412) and  $Q^2$  (0.0 – 0.757) values of the permuted models are represented on the left-hand side of the plot, corresponding to y-axis intercepts.

**Table S1.** VOC profiles of PGPR strains: *Pseudomonas fluorescens* (N04), *Pseudomonas koreensis* (N19), *Paenibacillus alvei* (T19) and *Lysinibacillus sphaericus* (T22). Green indicates VOCs primarily present in N04 (but also in N19, T19 and T22); yellow indicates VOCs primarily present in N19 (also in T19 and T22); purple indicates VOCs primarily present in T19 (also in T22); and red indicates VOCs present only in T22.

| Rt<br>(min)     | Base mass<br>(m/z) | Compound name<br>(tentative annotation) | <i>P.f.</i> _N04 | <i>P.k.</i> _N19 | <i>P.a.</i> _T19 | <i>L.s.</i> _T22 |
|-----------------|--------------------|-----------------------------------------|------------------|------------------|------------------|------------------|
| <b>Alcohols</b> |                    |                                         |                  |                  |                  |                  |
| 02:48.3         | 55.04              | 1-Pentanol                              |                  |                  |                  |                  |
| 03:00.7         | 45.02              | 1-Hexanol, 6-amino-                     |                  |                  |                  |                  |
| 03:52.7         | 59.04              | 1-Hexanol                               |                  |                  |                  |                  |
| 04:07.0         | 56.06              | 2-Decanol                               |                  |                  |                  |                  |
| 05:15.6         | 85.06              | Pentanol, 5-amino-                      |                  |                  |                  |                  |
| 08:22.6         | 57.06              | 1-Penten-3-ol                           |                  |                  |                  |                  |
| 09:18.3         | 45.02              | 2-Undecanol                             |                  |                  |                  |                  |
| 09:48.2         | 43.01              | 2-Undecanol, acetate                    |                  |                  |                  |                  |
| 10:56.6         | 45.02              | 2-Tridecanol                            |                  |                  |                  |                  |
| 11:00.4         | 45.02              | 2-Tetradecanol                          |                  |                  |                  |                  |
| 11:02.3         | 55.04              | 11-Hexadecen-1-ol, (Z)-                 |                  |                  |                  |                  |
| 13:15.9         | 43.03              | 1-Hexadecanol                           |                  |                  |                  |                  |
| 16:53.4         | 71.06              | 2-Undecen-4-ol                          |                  |                  |                  |                  |
| <b>Ketones</b>  |                    |                                         |                  |                  |                  |                  |
| 01:42.1         | 43.00              | 2-Propanone, 1-methoxy-                 |                  |                  |                  |                  |
| 02:38.8         | 43.03              | 2-Butanone, 3-methyl-                   |                  |                  |                  |                  |
| 02:59.2         | 43.01              | 3-Pentanone                             |                  |                  |                  |                  |
| 04:10.5         | 43.04              | 4-Heptanone                             |                  |                  |                  |                  |
| 06:31.4         | 43.02              | 3-Nonanone                              |                  |                  |                  |                  |
| 07:49.3         | 43.03              | 6,7-Dodecanedione                       |                  |                  |                  |                  |
| 08:46.7         | 120.07             | Acetophenone, 4'-amino-                 |                  |                  |                  |                  |
| 08:54.8         | 69.04              | 2-Octen-4-one                           |                  |                  |                  |                  |
| 09:30.7         | 58.03              | 2-Dodecanone                            |                  |                  |                  |                  |
| 10:54.3         | 43.02              | 2-Nonadecanone                          |                  |                  |                  |                  |
| 11:05.9         | 43.02              | 11-Dodecen-2-one                        |                  |                  |                  |                  |
| 11:47.0         | 57.06              | 8-Pentadecanone                         |                  |                  |                  |                  |
| 12:26.9         | 58.04              | 2-Tetradecanone                         |                  |                  |                  |                  |
| <b>Alkanes</b>  |                    |                                         |                  |                  |                  |                  |
| 01:59.3         | 59.04              | Propane, 1-ethoxy-                      |                  |                  |                  |                  |
| 01:59.7         | 57.06              | n-Hexane                                |                  |                  |                  |                  |
| 02:31.3         | 59.04              | Butane, 1-ethoxy-                       |                  |                  |                  |                  |
| 02:53.6         | 45.01              | 2-Ethoxypentane                         |                  |                  |                  |                  |
| 03:01.4         | 43.01              | Pentane, 1-ethoxy-                      |                  |                  |                  |                  |
| 03:32.4         | 59.04              | Propane, 1,1-diethoxy-                  |                  |                  |                  |                  |
| 04:04.8         | 43.03              | Heptane, 2,3-dimethyl-                  |                  |                  |                  |                  |
| 04:28.2         | 43.03              | Nonane                                  |                  |                  |                  |                  |
| 04:50.9         | 57.06              | Octane, 2,2,6-trimethyl-                |                  |                  |                  |                  |
| 05:09.6         | 57.06              | Octane, 3,6-dimethyl-                   |                  |                  |                  |                  |
| 06:04.7         | 117.10             | Indane                                  |                  |                  |                  |                  |
| 07:40.5         | 43.03              | Undecane                                |                  |                  |                  |                  |
| 10:09.0         | 57.06              | Tetradecane, 3-methyl-                  |                  |                  |                  |                  |
| 11:11.9         | 43.03              | Hexadecane                              |                  |                  |                  |                  |
| 11:30.6         | 91.06              | Undecane, 6-phenyl-                     |                  |                  |                  |                  |
| 12:45.9         | 57.06              | Heptadecane                             |                  |                  |                  |                  |
| 13:22.9         | 57.06              | Octadecane                              |                  |                  |                  |                  |
| 15:17.3         | 57.06              | Heneicosane                             |                  |                  |                  |                  |
| 15:33.8         | 57.06              | Nonadecane                              |                  |                  |                  |                  |

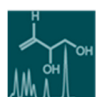

|                                   |        |                                     |  |  |  |  |
|-----------------------------------|--------|-------------------------------------|--|--|--|--|
| 15:35.3                           | 43.03  | Dodecane, 2-methyl-6-propyl-        |  |  |  |  |
| 18:07.9                           | 71.09  | Triacotane                          |  |  |  |  |
| 18:08.0                           | 57.06  | Hexacosane                          |  |  |  |  |
| <b>Sulfides</b>                   |        |                                     |  |  |  |  |
| 02:56.7                           | 94.00  | Disulfide, dimethyl                 |  |  |  |  |
| 05:21.0                           | 126.01 | Dimethyl trisulfide                 |  |  |  |  |
| 06:34.5                           | 57.07  | Sulfone, butyl isopropyl            |  |  |  |  |
| 07:27.5                           | 91.07  | Benzyl methyl sulfide               |  |  |  |  |
| <b>Alkenes</b>                    |        |                                     |  |  |  |  |
| 04:27.2                           | 91.07  | Benzene, 1,3-dimethyl-              |  |  |  |  |
| 04:44.8                           | 57.06  | Benzene, (2-methyloctyl)-           |  |  |  |  |
| 06:28.8                           | 67.05  | 1,9-Decadiene                       |  |  |  |  |
| 06:31.7                           | 54.03  | 1,4-Undecadiene, (E)-               |  |  |  |  |
| 06:34.3                           | 70.07  | 1-Undecene                          |  |  |  |  |
| 07:34.5                           | 41.02  | Z-1,8-Dodecadiene                   |  |  |  |  |
| 08:29.0                           | 45.02  | 1-Nonene                            |  |  |  |  |
| 08:58.2                           | 43.03  | 1-Undecene, 7-methyl-               |  |  |  |  |
| 09:53.0                           | 71.04  | 3-Methoxyhex-1-ene                  |  |  |  |  |
| 10:19.8                           | 55.04  | 7-Hexadecene, (Z)-                  |  |  |  |  |
| 10:33.0                           | 43.03  | 1,9-Dodecadiene                     |  |  |  |  |
| 11:02.4                           | 55.04  | 1,13-Tetradecadiene                 |  |  |  |  |
| <b>Salicylic acid derivatives</b> |        |                                     |  |  |  |  |
| 07:44.0                           | 120.05 | Methyl salicylate                   |  |  |  |  |
| 10:48.3                           | 120.05 | Isoamyl salicylate                  |  |  |  |  |
| 11:55.0                           | 120.04 | n-Hexyl salicylate                  |  |  |  |  |
| <b>Terpenoids</b>                 |        |                                     |  |  |  |  |
| 05:21.3                           | 93.08  | $\beta$ -Phellandrene               |  |  |  |  |
| 05:25.1                           | 93.08  | $\beta$ -Pinene                     |  |  |  |  |
| 05:46.3                           | 43.98  | $\beta$ -Ocimene                    |  |  |  |  |
| 05:57.9                           | 68.06  | D-Limonene                          |  |  |  |  |
| 06:07.1                           | 91.06  | $\alpha$ -Pinene                    |  |  |  |  |
| 06:16.9                           | 93.08  | $\tau$ -Terpinene                   |  |  |  |  |
| 07:58.0                           | 41.02  | Citronellol                         |  |  |  |  |
| <b>Aldehydes</b>                  |        |                                     |  |  |  |  |
| 02:16.5                           | 44.02  | Butanal, 3-methyl-                  |  |  |  |  |
| 05:12.3                           | 77.04  | Benzaldehyde                        |  |  |  |  |
| 05:37.0                           | 41.02  | Octanal                             |  |  |  |  |
| 06:07.0                           | 91.06  | Benzeneacetaldehyde                 |  |  |  |  |
| 06:13.7                           | 41.02  | 2-Octenal, (E)-                     |  |  |  |  |
| 06:42.7                           | 57.05  | Nonanal                             |  |  |  |  |
| 07:44.9                           | 43.03  | Decanal                             |  |  |  |  |
| 08:08.0                           | 41.02  | 2,6-Octadienal, 3,7-dimethyl-, (Z)- |  |  |  |  |
| 08:35.6                           | 58.11  | Hexanal, 2-methyl-                  |  |  |  |  |
| 08:43.8                           | 57.05  | Undecanal                           |  |  |  |  |
| 09:38.4                           | 57.05  | Dodecanal                           |  |  |  |  |
| 11:19.3                           | 43.03  | Tetradecanal                        |  |  |  |  |
| 12:50.2                           | 57.05  | Octadecanal                         |  |  |  |  |
| <b>Carboxylic acids</b>           |        |                                     |  |  |  |  |
| 02:37.8                           | 57.02  | Propanoic acid, ethyl ester         |  |  |  |  |
| 02:43.0                           | 43.04  | Butanoic acid, methyl ester         |  |  |  |  |
| 04:22.0                           | 43.02  | Butanethioic acid, S-methyl ester   |  |  |  |  |
| 08:39.8                           | 127.13 | Octanethioic acid, S-hexyl ester    |  |  |  |  |
| 09:29.5                           | 88.06  | Decanoic acid, ethyl ester          |  |  |  |  |
| 12:36.8                           | 105.05 | Benzoic acid, 3-methylphenyl ester  |  |  |  |  |
| 12:50.2                           | 43.03  | Pentadecanoic acid                  |  |  |  |  |
| 13:46.3                           | 43.03  | n-Hexadecanoic acid                 |  |  |  |  |
| 14:24.9                           | 88.06  | Octadecanoic acid, ethyl ester      |  |  |  |  |

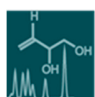

| Furans   |        |                                       |  |  |  |  |
|----------|--------|---------------------------------------|--|--|--|--|
| 02:07.1  | 41.02  | 2(3H)-Furanone, dihydro-3-methyl-     |  |  |  |  |
| 05:04.7  | 128.05 | 2-Methyl-3-(methylthio) furan         |  |  |  |  |
| 05:30.5  | 81.04  | Furan, 2-pentyl-                      |  |  |  |  |
| 05:37.7  | 118.06 | Benzofuran                            |  |  |  |  |
| 08:05.2  | 115.05 | Furan, 3-phenyl-                      |  |  |  |  |
| Amines   |        |                                       |  |  |  |  |
| 01:34.9  | 42.98  | 2-Methanesulfonylethanamine           |  |  |  |  |
| 02:01.4  | 43.97  | 2-Pentanamine                         |  |  |  |  |
| 02:23.0  | 43.96  | 1-Hexanamine                          |  |  |  |  |
| 02:24.7  | 43.98  | 2-Octanamine                          |  |  |  |  |
| 02:38.8  | 61.02  | Monoethanolamine                      |  |  |  |  |
| 02:50.2  | 56.05  | 2-Propen-1-amine                      |  |  |  |  |
| 03:57.0  | 41.01  | Propylamine                           |  |  |  |  |
| 04:09.6  | 57.06  | 1,3-Propanediamine                    |  |  |  |  |
| 04:51.2  | 41.01  | 1-Heptanamine                         |  |  |  |  |
| 05:05.0  | 42.97  | 1-Butanamine, 3-methyl-               |  |  |  |  |
| 05:34.8  | 91.07  | Benzeneethanamine                     |  |  |  |  |
| 06:03.2  | 59.04  | Propylamine                           |  |  |  |  |
| 08:34.9  | 41.70  | Ethylenediamine                       |  |  |  |  |
| 10:10.1  | 73.05  | 1-Butanamine                          |  |  |  |  |
| Pyrazine |        |                                       |  |  |  |  |
| 04:36.8  | 42.01  | Pyrazine, 2,5-dimethyl-               |  |  |  |  |
| 05:38.5  | 42.01  | Pyrazine, trimethyl-                  |  |  |  |  |
| 06:11.9  | 121.10 | Pyrazine, 2-methyl-5-(1-methylethyl)- |  |  |  |  |
| 07:03.8  | 108.09 | 2-Isobutyl-3-methylpyrazine           |  |  |  |  |
| 07:18.0  | 149.14 | Pyrazine, 3,5-diethyl-2-methyl-       |  |  |  |  |
| 08:16.4  | 122.11 | Pyrazine, 3-butyl-2,5-dimethyl-       |  |  |  |  |
